# Supplementary material for: Identification of a B-Cell Epitope in the VP3 Protein of Senecavirus A
Source: MDPI journal article supplement (doi:10.3390/v13112300), 2021-11-18
Supplement: s1 [file s1]

# APPLIED MICROBIOLOGY AND BIOTECHNOLOGY

## Identification of a B-cell epitope in the VP3 protein of Senecavirus A

Mi Chen<sup>a</sup>, Lulu Chen<sup>a</sup>, Jing Wang<sup>a</sup>, Chunxiao Mou<sup>a</sup>, Zhenhai Chen<sup>a,b,c #</sup>

<sup>a</sup>College of Veterinary Medicine, Yangzhou University, Yangzhou, JS, China;

<sup>b</sup>Joint International Research Laboratory of Agriculture and Agri-Product Safety, the Ministry of Education of China, Yangzhou University, China;

<sup>c</sup>Jiangsu Co-Innovation Center for Prevention and Control of Important Animal Infectious Diseases and Zoonoses, Yangzhou University, China.

<sup>#</sup>corresponding author

Corresponding author:

**Zhenhai Chen**, Ph.D. | [zhenhai@yzu.edu.cn](mailto:zhenhai@yzu.edu.cn)

Professor, College of Veterinary Medicine

Yangzhou University

12 Wen-hui East Road

Yangzhou, JS225009, China

Cell:18252747459

Tel: +86-514-89798271

Fax: 0514-87972218

**Table S1**

Primers used for construction of VP3 truncations.

| Name      | Sequence(5'-3')                                | Residues sites |
|-----------|------------------------------------------------|----------------|
| VP3       | F TGCCGGGGT <u>ACCGG</u> ACCTATGATGGCAAGA      | 123-243aa      |
|           | R GCACCGGA <u>AATTC</u> TTAGTTGTTCGGTGGAGTGGAA |                |
| N123-157  | F CAGAAC <u>GAGCTC</u> GGACCTATGATGGC          | 123-157aa      |
|           | R CAGCAC <u>CCGCGG</u> GTTTAAGCCTATATCC        |                |
| N137-171  | F CATGAC <u>GAGCTC</u> CAACCACAGACCCTTTC       | 137-171aa      |
|           | R CAATAC <u>CCGCGG</u> CCGAGTTTCAC             |                |
| N161-195  | F CAGCAC <u>GAGCTC</u> TCTAGTTGGACCTTTG        | 161-195aa      |
|           | R CAGCTC <u>CCGCGG</u> AATTTGGTCAGC            |                |
| N185-219  | F CATCAG <u>GAGCTC</u> ATTACCAATTCGG           | 185-219aa      |
|           | R CAATAC <u>CCGCGG</u> GGGTGTAATCC             |                |
| N209-243  | F CAGCAG <u>GAGCTC</u> CTACCACCTGATTGC         | 209-243aa      |
|           | R CAATAC <u>CCGCGG</u> GTTGTTCGGTG             |                |
| N161-181  | F CAGCAG <u>GAGCTC</u> AGTTGGACCTTTGTCATC      | 161-181aa      |
|           | R CAATAC <u>CCGCGG</u> CCGAGTTTCACGGTAATC      |                |
| N176-191  | F CAGCAG <u>GAGCTC</u> TACCGTGAAACTCGGG        | 176-191aa      |
|           | R CAATAC <u>CCGCGG</u> ATCAGCAGAATAAACTGAG     |                |
| N186-201  | F CAGCAG <u>GAGCTC</u> GTATTCTGCTGATGG         | 186-201aa      |
|           | R CAATAC <u>CCGCGG</u> TTTGGTCAGCTTGTG         |                |
| N196-211  | F CAGCAG <u>GAGCTC</u> CACAAGCTGACCAAAATTC     | 196-211aa      |
|           | R CAATAC <u>CCGCGG</u> ACTCTGTGGGCAG           |                |
| N1206-219 | F CAGCAG <u>GAGCTC</u> CCTGACTGCCCACAG         | 206-219aa      |
|           | R CAATAC <u>CCGCGG</u> GAGAGGCAAAAAAGAG        |                |

**Table S2**

Primers used to generate specific mutations in the VP3 gene of the infectious clone pC3-SVA-GD05.

| Mutant |   | Sequence(5'-3')                                  |
|--------|---|--------------------------------------------------|
| G192A  | F | CCAACTCAGTTTATTCTGCTGATgctTGGTTTAGCCTGCACAAGCTG  |
|        | R | CAGCTTGTGCAGGCTAAACCAagcATCAGCAGAATAAACTGAGTTGG  |
| W193A  | F | AACTCAGTTTATTCTGCTGATGGTgctTTTAGCCTGCACAAGCTGAC  |
|        | R | TAATTTTGGTCAGCTTGTGCAGGCTAAAagcACCATCAGCAGAATA   |
| F194A  | F | TTATTCTGCTGATGGTTGGgctAGCCTGCACAAGCTGACCAAAATT   |
|        | R | TTTGGTCAGCTTGTGCAGGCTagcCCAACCATCAGCAGAATAAAC    |
| S195A  | F | ATTCTGCTGATGGTTGGTTTgctCTGCACAAGCTGACCAAAATTACT  |
|        | R | TTGGTCAGCTTGTGCAGagcAAACCAACCATCAGCAGAATAAACT    |
| L196A  | F | GCTGATGGTTGGTTTAGCgctCACAAGCTGACCAAAATTACTCTAC   |
|        | R | TAATTTTGGTCAGCTTGTGagcGCTAAACCAACCATCAGCAGAATAAA |
| H197A  | F | CTGCTGATGGTTGGTTTAGCCTGgctAAGCTGACCAAAATTACTC    |
|        | R | GAGTAATTTTGGTCAGCTTagcCAGGCTAAACCAACCATCAGCAG    |
| K198A  | F | TGATGGTTGGTTTAGCCTGCACgctCTGACCAAAATTACTCTACCAC  |
|        | R | TGGTAGAGTAATTTTGGTCAGagcGTGCAGGCTAAACCAACCATCAGC |
| L199A  | F | TTGGTTTAGCCTGCACAAGgctACCAAAATTACTCTACCACCTGAC   |
|        | R | TGGTAGAGTAATTTTGGTagcCTTGTGCAGGCTAAACCAACCATC    |
| T200A  | F | GGTTGGTTTAGCCTGCACAAGCTGgctAAAATTACTCTACCACC     |
|        | R | GGTGGTAGAGTAATTTTagcCAGCTTGTGCAGGCTAAACCAACC     |
| K201A  | F | TTTAGCCTGCACAAGCTGACCgctATTACTCTACCACCTGACTGC    |
|        | R | GTCAGGTGGTAGAGTAATagcGGTCAGCTTGTGCAGGCTAAACCAAC  |
